# Supplementary material
Source: publisher figshare collection journal article supplement (https://sage.figshare.com/ndownloader/files/20277288)
Supplement: Supplementary file 1 [file 20277288]

## Supplementary Figure 1

### Dectin-1

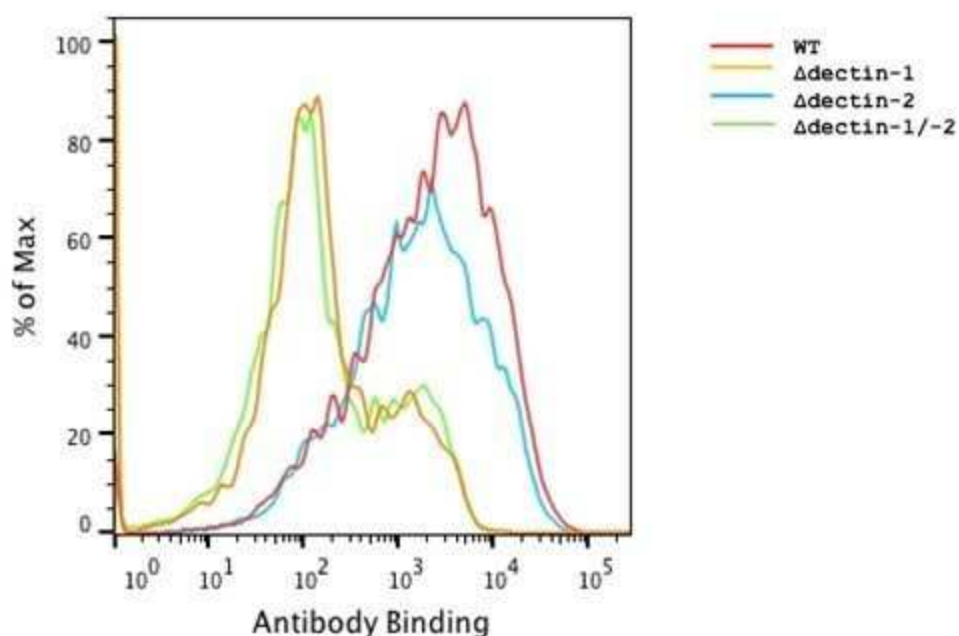

### Dectin-2

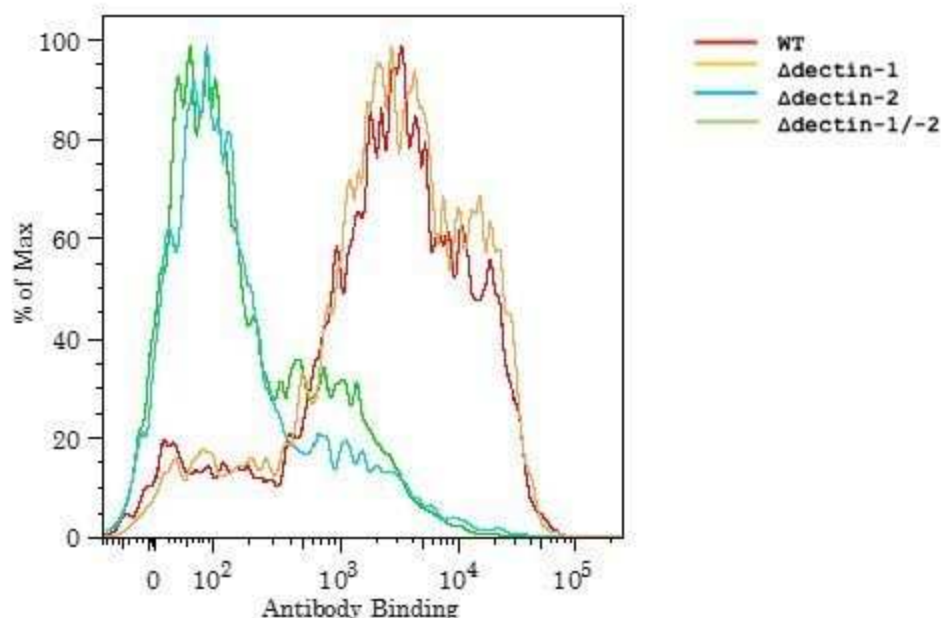

Supplementary Figure 1. Characterization of dko [dectin-1/dectin-2 deficient] mice. DKO mice were produced by crossing each singly deficient (dectin-1 and dectin-2 ko) mice. Cell surface expression of dectin-1 and dectin-2 on BMDCs. BMDCs were produced as described in the **Materials and Methods** section and analyzed by FACS after staining with anti-dectin-1 antibody (AbD Serotec) [upper panel] or anti-dectin-2 antibody (MACS) [lower panel].

## Supplementary Figure 2

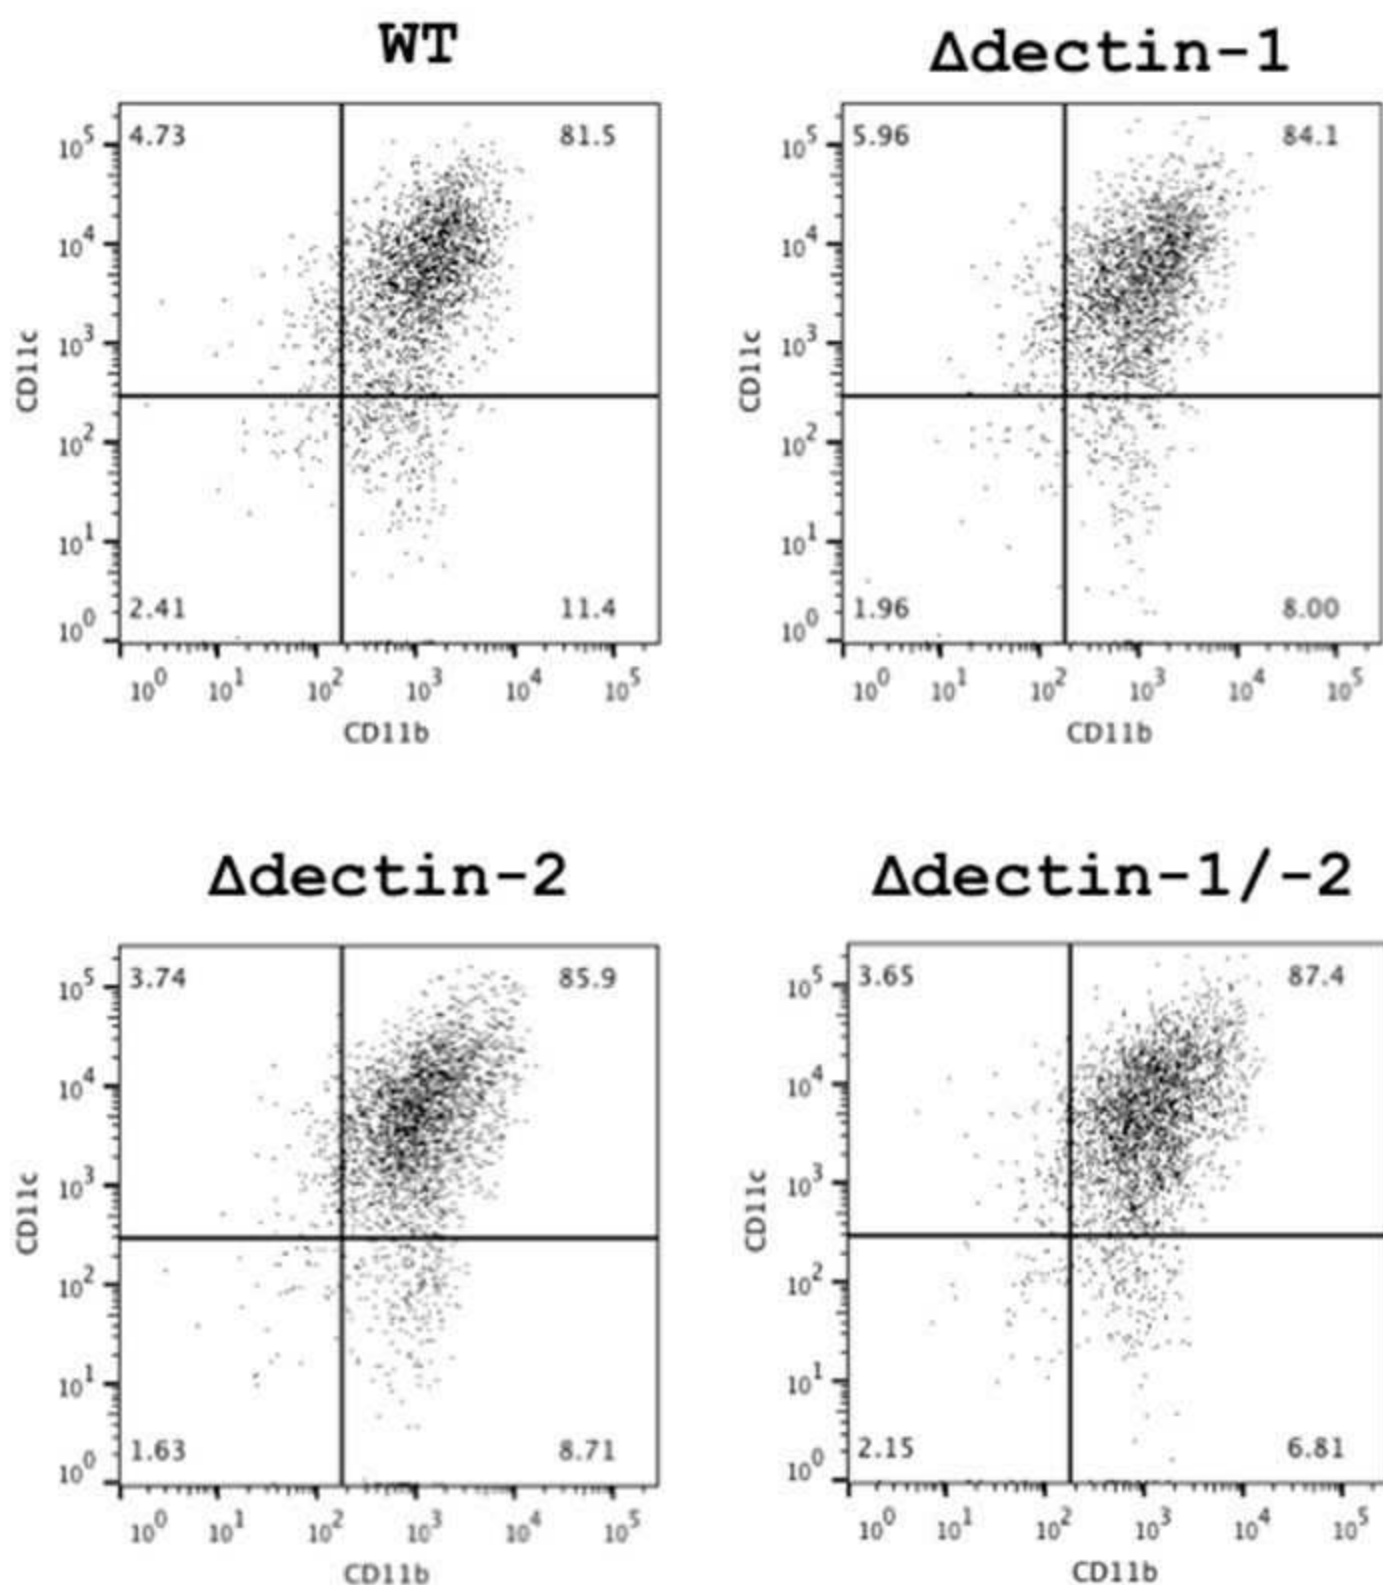

Supplementary Figure 2. Phenotyping of BMDCs by FACS. BMDCs were produced as described in the Materials and Methods section and analyzed by FACS after staining with anti-CD11b antibody and anti-CD11c antibody (Biolegend)
